# Supplementary material for: The transcription factor Zeb1 controls homeostasis and function of type 1 conventional dendritic cells
Source: PubMed Central journal article supplement (PMC10589231; doi:10.1038/s41467-023-42428-7), 2023-10-20
Supplement: 41467_2023_42428_MOESM1_ESM.pdf [file 41467_2023_42428_MOESM1_ESM.pdf]

## Supplementary information for

# **The transcription factor Zeb1 controls homeostasis and function of type 1 conventional dendritic cells**

Yan Wang<sup>1,#</sup>, Quan Zhang<sup>2,3,#</sup>, Tingting He<sup>1</sup>, Yechen Wang<sup>1</sup>, Tianqi Lu<sup>1</sup>, Zengge Wang<sup>1</sup>, Yiyi Wang<sup>1</sup>, Shen Lin<sup>3</sup>, Kang Yang<sup>1</sup>, Xinming Wang<sup>1</sup>, Jun Xie<sup>1</sup>, Ying Zhou<sup>2,3</sup>, Yazhen Hong<sup>1</sup>, Wen-Hsien Liu<sup>1</sup>, Kairui Mao<sup>1</sup>, Shih-Chin Cheng<sup>1</sup>, Xin Chen<sup>1</sup>, Qiyuan Li<sup>2,3,4,\*</sup>, Nengming Xiao<sup>1,\*</sup>

<sup>1</sup> State Key Laboratory of Cellular Stress Biology, Innovation Center for Cell Signaling Network, School of Life Sciences, Faculty of Medicine and Life Sciences, Xiamen University, Xiamen, Fujian 361102, China

<sup>2</sup> National Institute for Data Science in Health and Medicine, Xiamen University, Fujian 361102, China

<sup>3</sup> School of Medicine, Xiamen University, Xiamen, Fujian 361102, China

<sup>4</sup> Department of Hematology, The First Affiliated Hospital of Xiamen University, Xiamen, 361003, China

# These authors contributed equally to this study: Yan Wang, Quan Zhang.

**\*Correspondence should be addressed to Q.L. (qiyuan.li@xmu.edu.cn) or N.X. (nengming@xmu.edu.cn).**

### **Supplementary information includes:**

Supplementary Figures 1-9

Legends for Supplementary Data 1-5

# Supplementary Figure 1

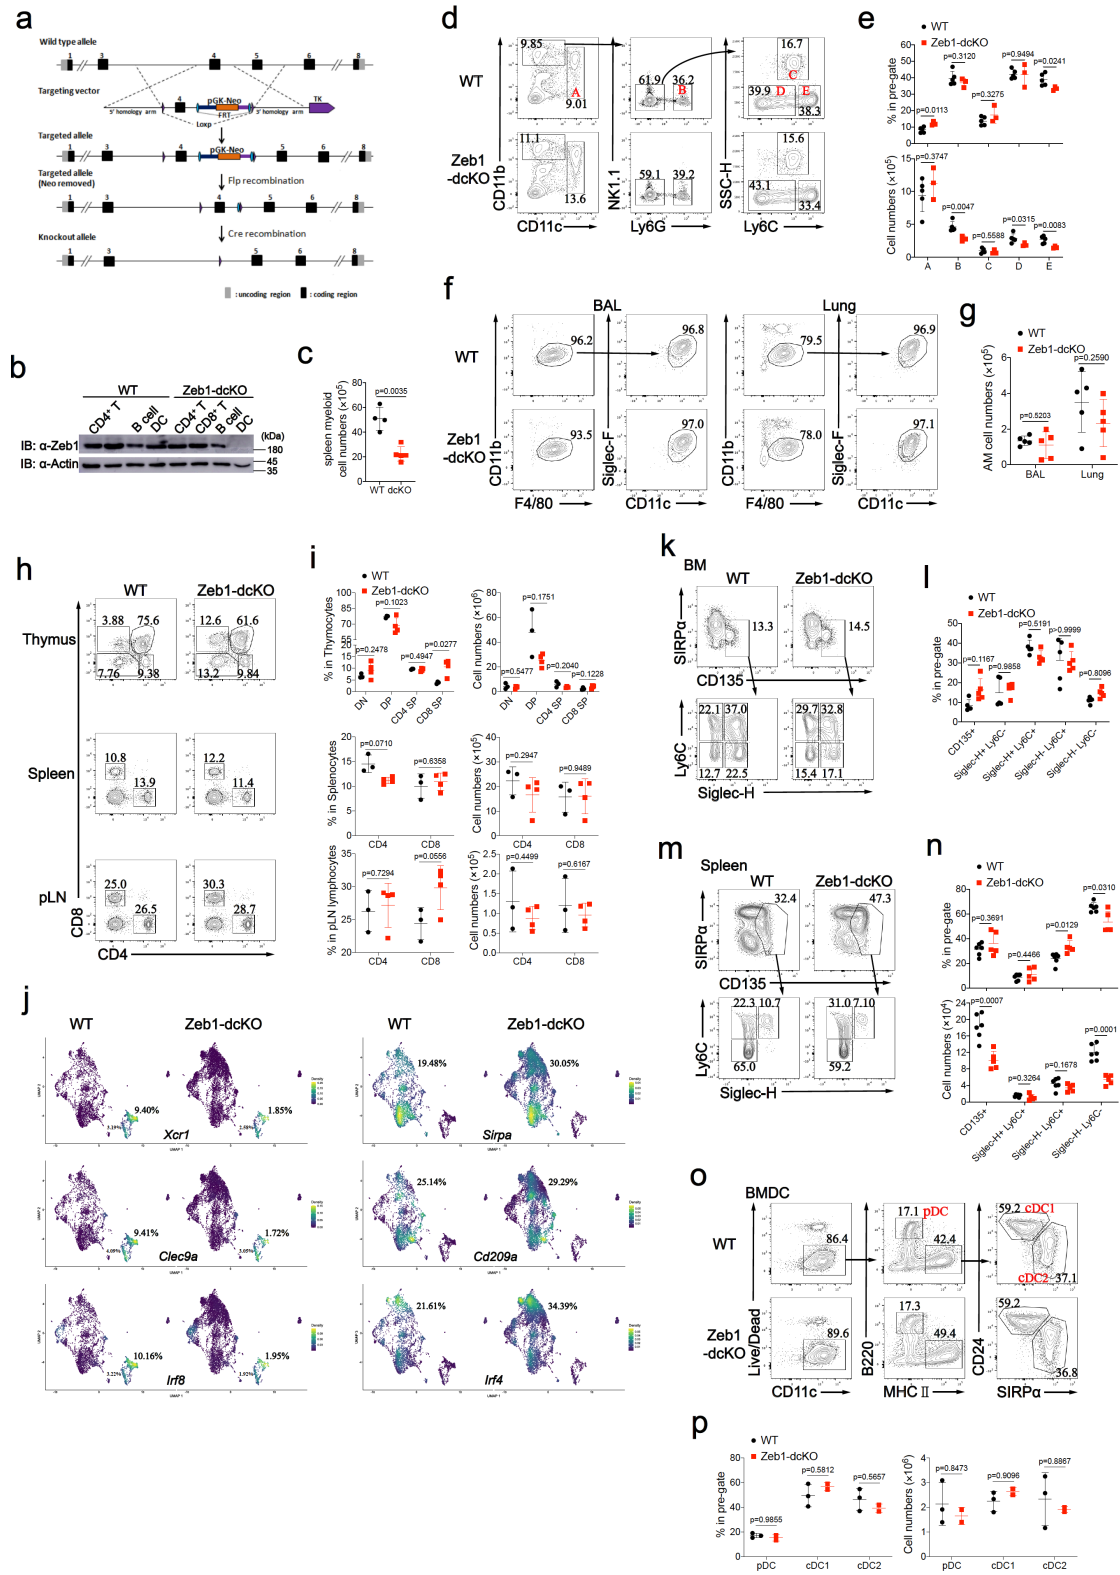

**Supplementary Fig. 1. Zeb1 expression in DC is dispensable for the development of immune cells except splenic cDC1.**

(a) Strategy for Zeb1 gene targeting. (b) Immunoblot analysis of Zeb1 protein in immune cells of spleens from WT and Zeb1-dcKO mice. (c) Numbers of total myeloid cells in the spleen from WT and Zeb1-dcKO mice (WT, n=4; Zeb1-dcKO, n=5) (d) Flow cytometry of Lin<sup>-</sup> splenocytes from WT and Zeb1-dcKO mice was used to identify myeloid leukocytes including CD11c<sup>+</sup> dendritic cells (A), CD11b<sup>+</sup>Ly6G<sup>+</sup> neutrophils (B), CD11b<sup>+</sup>Ly6G<sup>-</sup>SSC<sup>hi</sup> eosinophils (C), Ly6C<sup>-</sup> resident (D) and Ly6C<sup>+</sup> inflammatory (E) CD11b<sup>+</sup>Ly6G<sup>-</sup>SSC<sup>lo</sup> monocytes/macrophages. (e) Frequencies (among their pre-gated cells) and numbers of myeloid leukocytes in the spleen from mice as in d (WT, n=5; Zeb1-dcKO, n=3). (f) Flow cytometry of CD45<sup>+</sup> cells was used to identify alveolar macrophage (AM) in BAL fluid and lung from WT and Zeb1-dcKO mice. (g) Numbers of AM (CD11c<sup>+</sup>Siglec-F<sup>+</sup>) in BAL fluid and lung from mice as in e (n=5). (h) Flow cytometry of thymocytes, splenocytes, and pLN lymphocytes from WT and Zeb1-dcKO mice. (i) Frequencies and numbers of thymocyte subsets and peripheral T cells from mice as in h (WT, n=3; Zeb1-dcKO, n=4). (j) Feature plots demonstrating the density distribution of signature genes expression at single-cell level in WT and Zeb1-deficient splenic cDC populations using sc-RNA-seq data. (k, m) Flow cytometry of live Lin<sup>-</sup>CD11c<sup>+</sup>CD45R<sup>-</sup>MHC II<sup>-int</sup> CDP in BM (k) or spleen (m) from WT and Zeb1-dcKO mice, was used to identify CD135<sup>+</sup> pre-DC and their subsets. (l, n) Frequencies and numbers of CD135<sup>+</sup> pre-DC and their subsets among their pre-gated cells in BM (l: n=5) or spleen (n: WT, n=6; Zeb1-dcKO, n=5) from mice as in k. (o) Flow cytometry of live CD11c<sup>+</sup> Flt3L-cultured BM cells of WT and Zeb1-dcKO mice was used to identify pDC, cDC1 and cDC2. (p) Frequencies and numbers of pDC, cDC1 and cDC2 among their pre-gated cells in Flt3L-cultured BM cells as in k (WT, n=3; Zeb1-dcKO, n=2). Each symbol represents an individual mouse, small horizontal lines indicate the mean ( $\pm$  s.d.). Data are representative of three independent experiments. Data are presented as mean  $\pm$  s.d. Statistical analysis was performed using Two-tailed unpaired Student's test. Source data are provided as a Source Data file.

## Supplementary Figure 2

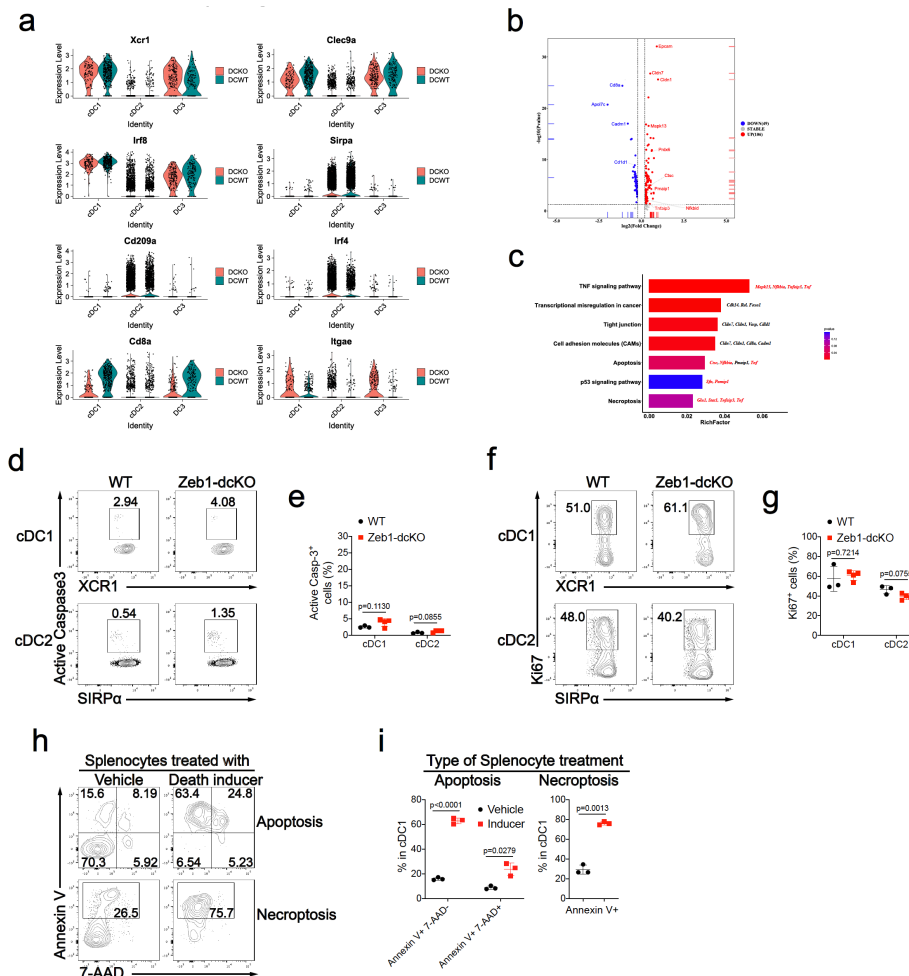

**Supplementary Fig. 2. Zeb1 deficiency does not affect identity, proliferation and apoptosis of splenic cDC1.**

(a) Violin plots showing expression of signature genes in three cDC subsets from spleen of WT and Zeb1-dcKO mice. (b) Volcano plot illustrating differentially expressed genes (DEGs) in WT and Zeb1-deficient splenic cDC1 by scRNA-seq analysis. (c) KEGG pathway analysis of DEGs in WT and Zeb1-deficient splenic cDC1 by scRNA-seq analysis. (d, f) Flow cytometry of splenic cDC1 and cDC2 from WT and Zeb1-dcKO mice. (e, g) Frequencies of active Caspase-3<sup>+</sup> cells (e) or Ki67<sup>+</sup> cells (g) among splenic cDC1 or cDC2 from mice as in d (WT, n=3; Zeb1-dcKO, n=4). (h) Flow cytometry of splenic cDC1 after coculturing with live, apoptotic, or necroptotic splenocytes (Death inducer: TNF- $\alpha$ +Smac to induce apoptosis, TNF- $\alpha$ +Smac+Zvad to induce necroptosis). (i) Frequencies of dying cells among splenic cDC1 as in h (n=3). Each symbol represents an individual mouse, small horizontal lines indicate the mean ( $\pm$  s.d.). Data are representative of two (d to i) independent experiments. Data are presented as mean  $\pm$  s.d. Statistical analysis was performed using Two-tailed unpaired Student's test. Source data are provided as a Source Data file.

## Supplementary Figure 3

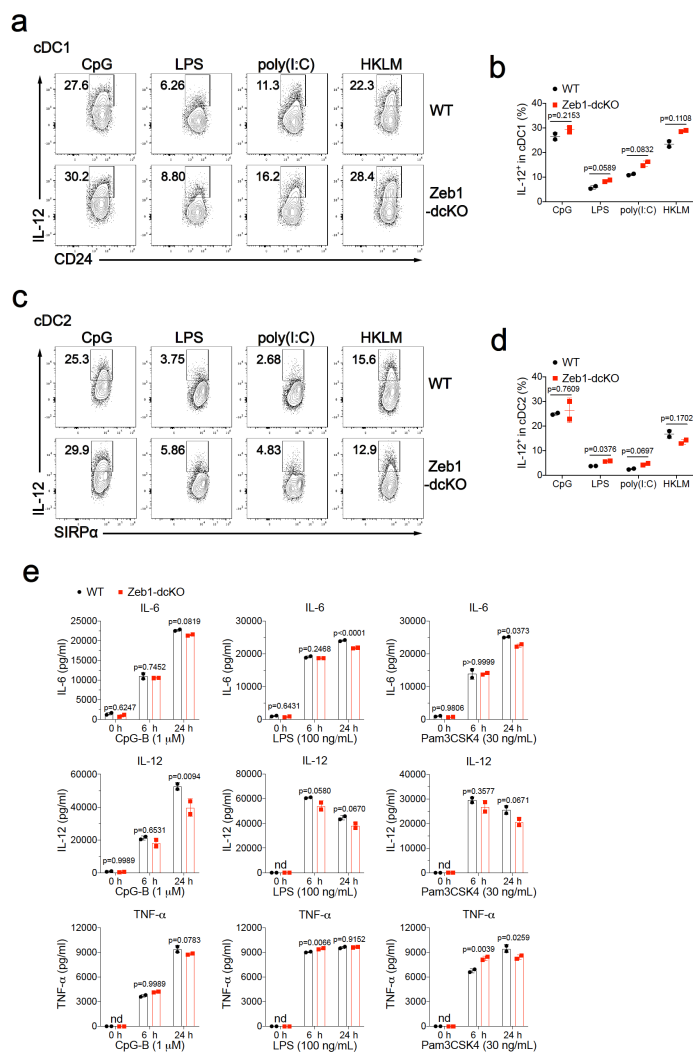

### Supplementary Fig. 3. Zeb1-deficient cDC have intact innate immune responses.

(a, c) Flow cytometry of WT and Zeb1-deficient Flt3L-cDC1 or -cDC2 challenged with different agonists including the TLR4 ligand LPS, TLR9 ligand CpG-B DNA, TLR3 ligand Poly(I:C) or HKLM for 4 h. Numbers adjacent to outlined areas indicate percentage of IL-12-producing cDC1 or cDC2. (b, d) Frequencies of IL-12-producing cDC1 or cDC2 among Flt3L-cDC1 or -cDC2 as in a or c (n=2). (e) ELISA of cytokines including IL-6, IL-12 and TNF- $\alpha$  in WT and Zeb1-deficient Flt3L-cDC stimulated with CpG-B, LPS or TLR2 ligand Pam3CSK4 for indicated times (n=2). Each symbol represents an individual sample, small horizontal lines indicate the mean ( $\pm$  s.d.). Data are representative of three independent experiments. Data are presented as mean  $\pm$  s.d. nd, not detected. Statistical analysis was performed using Two-tailed unpaired Student's test. Source data are provided as a Source Data file.

# Supplementary Figure 4

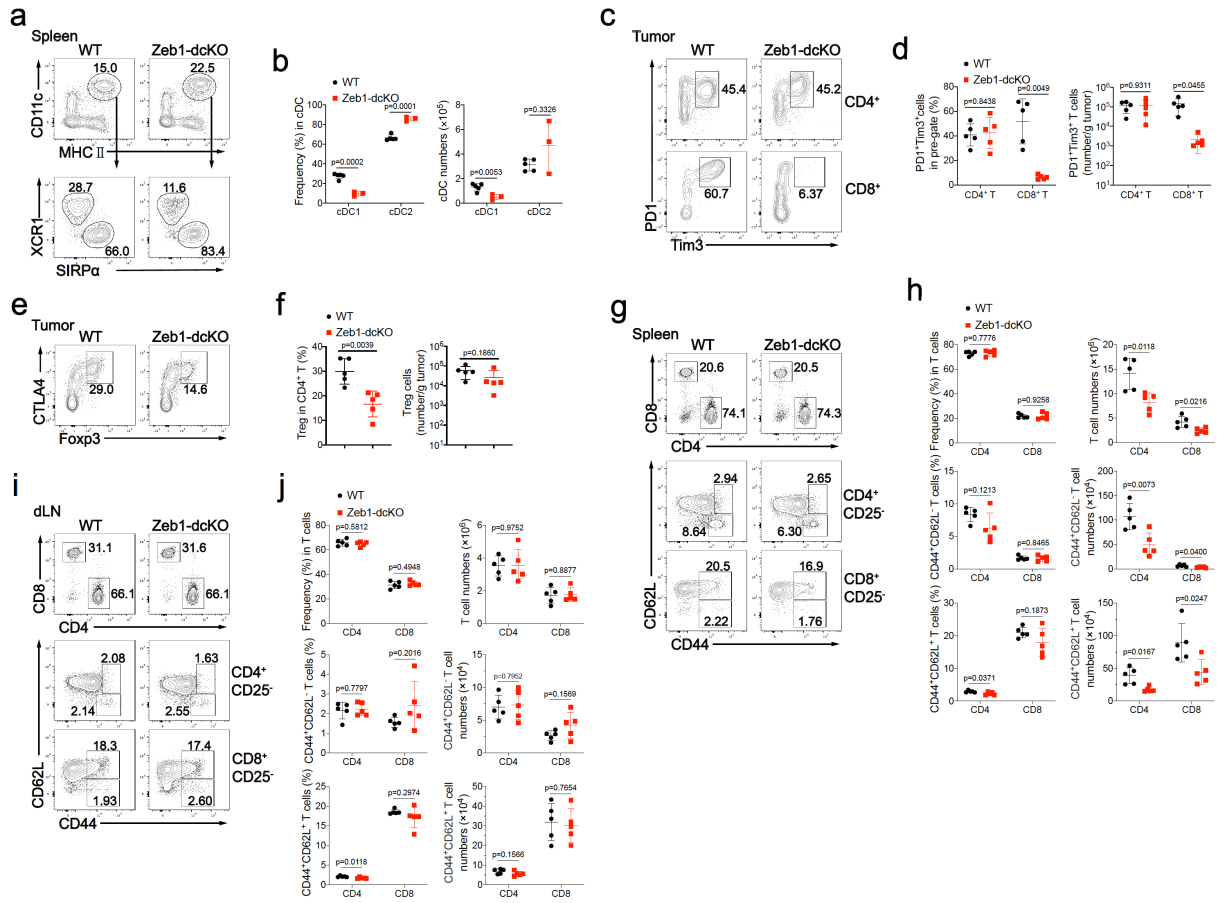

**Supplementary Fig. 4. Zeb1 deletion in DC does not affect T cell activation in secondary lymphoid organs of tumor-bearing mice.**

(a) Flow cytometry of live Lin<sup>-</sup>Ly6C<sup>-</sup> myeloid cells was used to identify cDC1 (CD11c<sup>+</sup>MHC II<sup>+</sup>XCR1<sup>+</sup>SIRPα<sup>-</sup>) and cDC2 (CD11c<sup>+</sup>MHC II<sup>+</sup>XCR1<sup>-</sup>SIRPα<sup>+</sup>) subsets in spleen from WT and Zeb1-dcKO mice at day 12 after s.c. injection with 2×10<sup>5</sup> B16F10 melanoma cells. (b) Frequencies (among total splenic cDC) and numbers of cDC1 and cDC2 in spleen of mice as in a (WT, n=5; Zeb1-dcKO, n=3). (c) Flow cytometry of activated (CD45<sup>+</sup>TCRβ<sup>+</sup>CD44<sup>+</sup>CD62L<sup>-</sup>) CD4<sup>+</sup> T cells (top row) and activated CD8<sup>+</sup> T cells (bottom row) in tumor from WT and Zeb1-dcKO mice at day 12 after s.c. injection with 2×10<sup>5</sup> B16F10 melanoma cells. (d) Frequencies (among activated T cells) and numbers of exhausted (PD-1<sup>+</sup>Tim3<sup>+</sup>) CD4<sup>+</sup> T cells or CD8<sup>+</sup> T cells in tumor from mice as in c (n=5). (e) Flow cytometry of (CD45<sup>+</sup>TCRβ<sup>+</sup>) CD4<sup>+</sup> T cells in tumors from mice as in c. (f) Frequencies (among CD4<sup>+</sup> T cells) and numbers of (Foxp3<sup>+</sup>CTLA4<sup>+</sup>) Treg cells in tumor from mice as in e (n=5). (g, i) Flow cytometry of total T cells (top row), CD25<sup>-</sup>CD4<sup>+</sup> (middle row) and CD25<sup>-</sup>CD8<sup>+</sup> (bottom row) T cells in spleen (g) or tumor dLN (i) from WT and Zeb1-dcKO mice at day 12 after s.c. injection with 2×10<sup>5</sup> B16F10 melanoma cells. (h, j) Frequencies and numbers of CD4<sup>+</sup> or CD8<sup>+</sup> T cells (among total T cells) (top row), CD44<sup>+</sup>CD62L<sup>-</sup> effector memory CD4<sup>+</sup> or CD8<sup>+</sup> T cells (middle row) and CD44<sup>+</sup>CD62L<sup>+</sup> central memory CD4<sup>+</sup> or CD8<sup>+</sup> T cells (bottom row) (among CD25<sup>-</sup>CD4<sup>+</sup> or CD25<sup>-</sup>CD8<sup>+</sup> T cells) in spleen (h) or tumor dLN (j) from mice as in c (n = 5). Each symbol represents an individual mouse, small horizontal lines indicate the mean (± s.d.). Data are representative of three independent experiments. Data are presented as mean ± s.d. Statistical analysis was performed using Two-tailed unpaired Student's test. Source data are provided as a Source Data file.

# Supplementary Figure 5

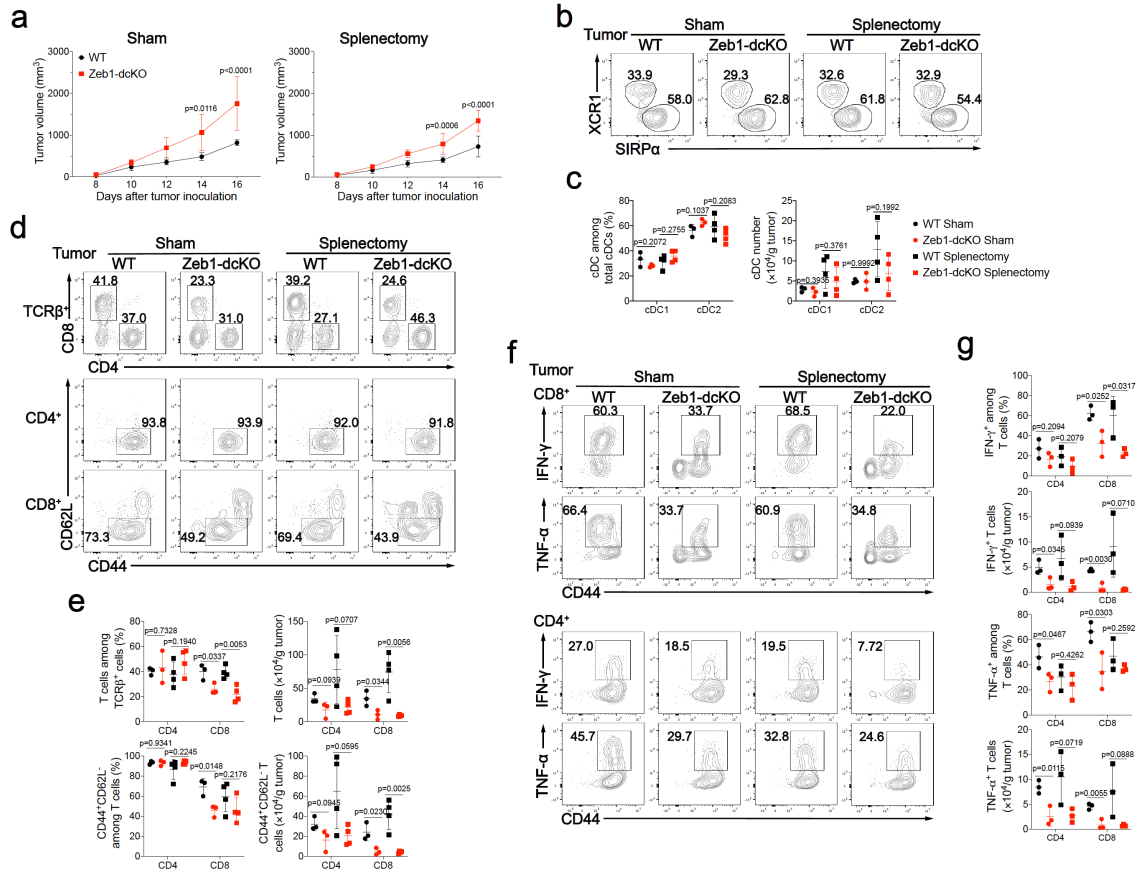



**Supplementary Fig. 5. Splenectomy did not ameliorate the defective antitumor T cell response in DC-specific Zeb1-deficient mice.**

**(a)** Tumor growth of WT and Zeb1-dcKO mice injected subcutaneously (s.c.) with  $2 \times 10^5$  B16F10 melanoma cells 6 days after splenectomy or sham-operation (n=5). **(b)** Flow cytometry of Lin<sup>-</sup>CD45<sup>+</sup>CD64<sup>-</sup>F4/80<sup>-</sup>MHC II<sup>+</sup>CD11c<sup>+</sup>CD26<sup>+</sup> myeloid cells was used to identify cDC1 (XCR1<sup>+</sup>SIRP $\alpha$ <sup>-</sup>) and cDC2 (XCR1<sup>-</sup>SIRP $\alpha$ <sup>+</sup>) subsets in tumors from mice as in **a** at day 16 after tumor inoculation. **(c)** Frequencies and numbers of cDC1 and cDC2 among CD11c<sup>+</sup>CD26<sup>+</sup> cDCs in tumors of mice as in **b** (sham, n=3; splenectomy, n=4). **(d)** Flow cytometry of tumor infiltrating TCR $\beta$ <sup>+</sup> T cells (TITs) (top row), TIL CD4<sup>+</sup> T cells (middle row), TIL CD8<sup>+</sup> T cells (bottom row) in tumor from mice as in **b**. **(e)** Frequencies and numbers of TIL CD4<sup>+</sup> or CD8<sup>+</sup> T cells (among TITs) (top row) and CD44<sup>+</sup>CD62L<sup>-</sup>CD4<sup>+</sup> (among TIL CD4<sup>+</sup> T cells) or CD44<sup>+</sup>CD62L<sup>-</sup>CD8<sup>+</sup> (among TIL CD8<sup>+</sup> T cells) activated T cells (bottom row) in tumor from mice as in **b** (sham, n=3; splenectomy, n=4). **(f)** Flow cytometry of TIL CD8<sup>+</sup> T cells (Top row), TIL CD4<sup>+</sup> T cells (bottom rows) in tumor from mice as in **b**. **(g)** Frequencies and numbers of IFN- $\gamma$ - and TNF- $\alpha$ -producing CD8<sup>+</sup> T cells (among TIL CD8<sup>+</sup> T cells) and of IFN- $\gamma$ - and TNF- $\alpha$ -producing CD4<sup>+</sup> T cells (among TIL CD4<sup>+</sup> T cells) in tumor from mice as in **b** (n=3). Each symbol represents an individual mouse, small horizontal lines indicate the mean ( $\pm$  s.d.). Data are presented as mean  $\pm$  s.d. Statistical analysis was performed using two-tailed unpaired Student's t-test (**c**, **e**, **g**), or two-way ANOVA with Sidak's multiple comparisons test (**a**). Source data are provided as a Source Data file.

## Supplementary Figure 6

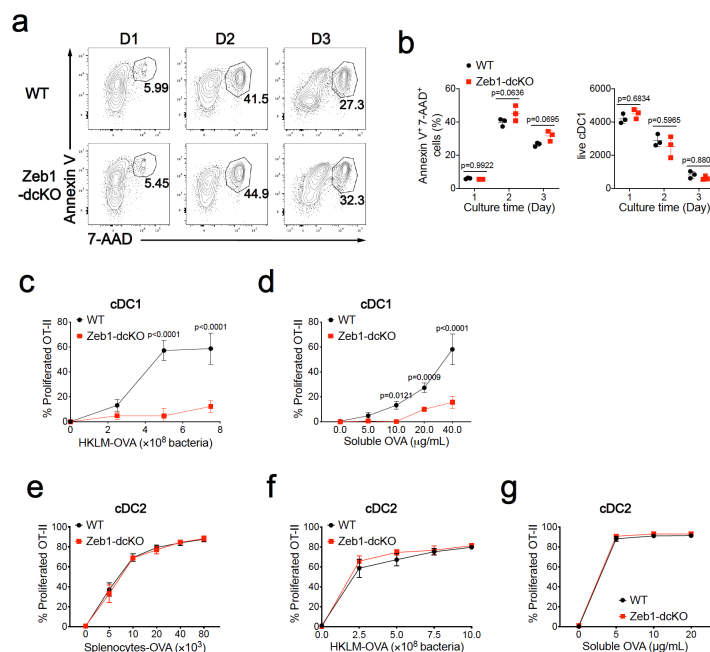

**Supplementary Fig. 6. Zeb1 is required for presentation of cell-associated and soluble antigens through MHC-II by cDC1 but not by cDC2.**

(a) Flow cytometry of the indicated Flt3L-cDC1 after being cultured for indicated days with CFSE-labeled OT- I T cells and HKLM-OVA. Numbers adjacent to outlined areas indicate percent dying (Annexin V<sup>+</sup> 7-AAD<sup>+</sup>) Flt3L-cDC1. (b) Frequencies of dying Flt3L-cDC1 among total cDC1 at different days from a (n=3). Each symbol represents an individual sample, small horizontal lines indicate the mean ( $\pm$  s.d.). (c,d) WT and Zeb1-deficient Flt3L-cDC1 were cultured for 3 days with CFSE-labeled OT- II T cells and different dose of HKLM-OVA (c) or soluble OVA (d) respectively, and assayed for OT- II proliferation and activation (CFSE<sup>+</sup>CD44<sup>+</sup>). (e to g) Flt3L-cDC2 of both genotypes were cultured for 3 days with CFSE-labeled OT- II T cells and various dose of irradiated OVA-loaded  $\beta$ 2m<sup>-/-</sup> splenocytes (e), or HKLM-OVA (f), or soluble OVA (g) respectively, and assayed for OT- II proliferation and activation (CFSE<sup>+</sup>CD44<sup>+</sup>). Data are representative of three independent experiments. Data are presented as mean  $\pm$  s.d. Statistical analysis was performed using two-way ANOVA with Sidak's multiple comparisons test. Source data are provided as a Source Data file.

# Supplementary Figure 7

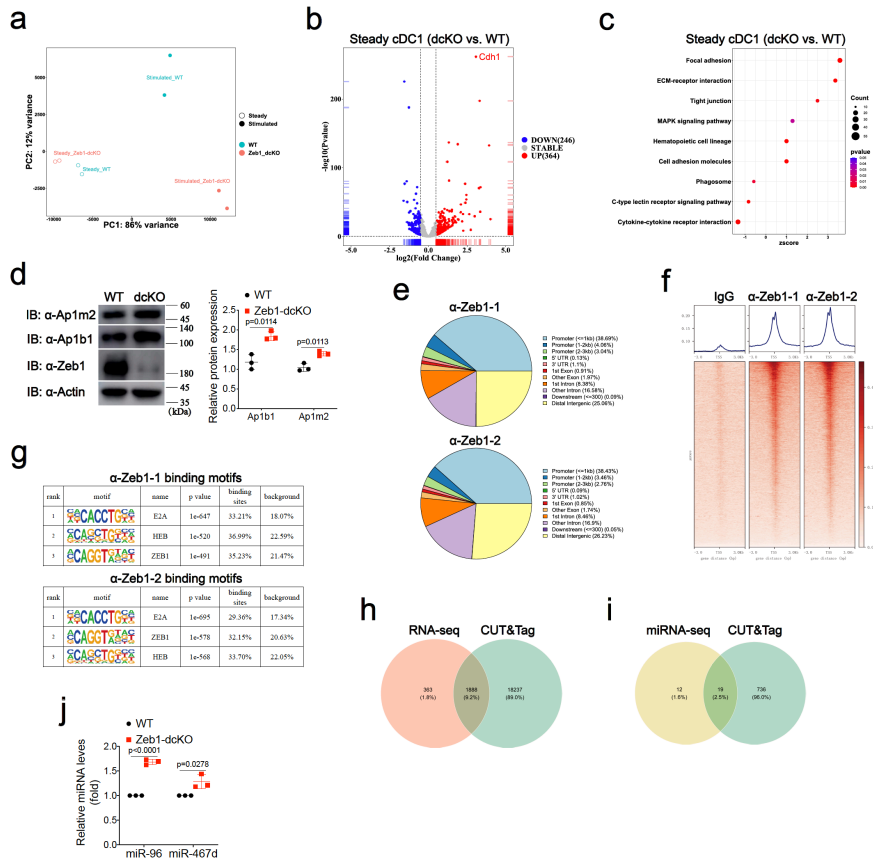

**Supplementary Fig. 7. Integrated analysis of transcriptomes and Zeb1 occupancy identifies Zeb1 target genes that support cross-presentation.**

(a) Principal Component Analysis (PCA) of the transcriptomes of WT and Zeb1-deficient Flt3L-cDC1 at steady state and after stimulation with HKLM-OVA for 4 h. (b) Volcano plots illustrating DEGs in WT and Zeb1-deficient Flt3L-cDC1 at steady state (n=2). (c) Bubble plot depicting KEGG pathway analysis of DEGs in WT and Zeb1-deficient Flt3L-cDC1 at steady state (n=2). (d) Immunoblot analysis of Ap1b1 and Ap1m2 in WT and Zeb1-deficient Flt3L-cDC1 after stimulation with HKLM-OVA for 4 h. Relative protein level is quantified by normalization to actin protein (n=3). (e) Pie charts demonstrating the distribution of Zeb1 binding peaks (CUT&Tag) across the genome annotated by CHIPseeker from independent biological replicates. (f) Deposition of Zeb1 binding peaks (CUT&Tag) centered on the promoter regions (TSS  $\pm$  3 kb) from independent biological replicates. (g) Known motif analysis identifying three top enriched DNA motifs from Zeb1 binding peaks (CUT&Tag) of independent biological replicates using HOMER database. (h) Venn diagram illustrating intersection of DEGs by comparing RNA-seq with CUT&Tag of Flt3L-cDC1 after stimulation. (i) Venn diagram illustrating intersection of DEGs by comparing miRNA-seq with CUT&Tag of Flt3L-cDC1 after stimulation. (j) Quantitative realtime PCR demonstrating relative expression of miR-96 and miR-467d in WT and Zeb1-deficient Flt3L-cDC1 after stimulation with HKLM-OVA for 4 h. Each symbol represents an individual sample, small horizontal lines indicate the mean ( $\pm$  s.d.). Data are representative of three independent experiments. Data are presented as mean  $\pm$  s.d. Statistical analysis was performed using Two-tailed unpaired Student's test. Source data are provided as a Source Data file.

# Supplementary Figure 8

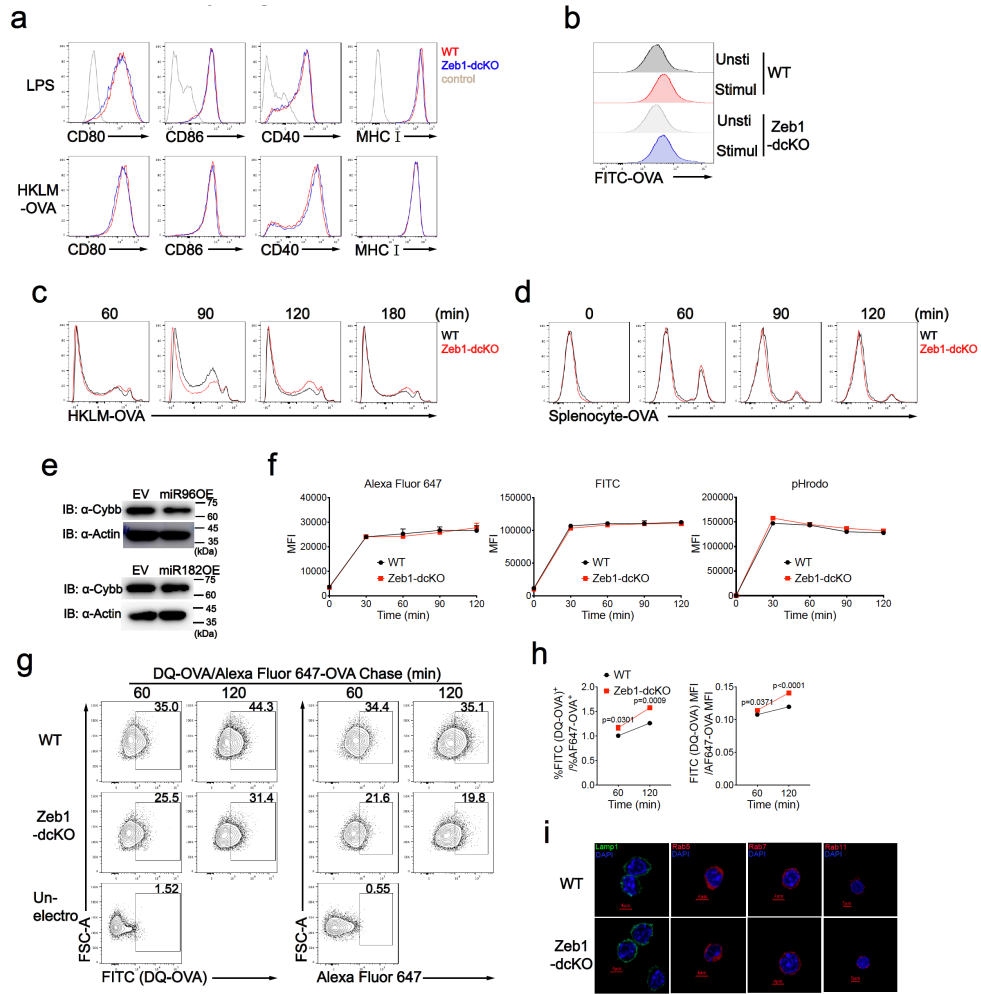

**Supplementary Fig. 8. Zeb1 ablation in DC does not affect cDC1 maturation and phagocytosis.**

(a) Flow cytometry of WT and Zeb1-deficient Flt3L-cDC1 challenged with 1  $\mu\text{g/ml}$  LPS or  $1 \times 10^8$  CFU HKLM-OVA for 24 h to measure the expression of CD80, CD86, CD40 and MHC- I . (b) Flow cytometry of WT and Zeb1-deficient Flt3L-cDC1 incubated with or without Alexa Fluor 488-labelled OVA for 4 h. (c, d) Flow cytometry of WT and Zeb1-deficient Flt3L-cDC1 incubated with Alexa Fluor 647-labelled HKLM-OVA (c) or Alexa Fluor 488-labelled OVA-loaded  $\beta 2\text{m}^{-/-}$  splenocyte (Splenocyte-OVA) (d) for indicated times. (e) Immunoblot analysis of Cybb in purified Flt3L-cDC1 transduced with control retrovirus (EV) or retrovirus encoding miR-96 (miR96OE) (top row) or miR-182 (miR182OE) (bottom row) during Flt3L-induced in-vitro DC development. (f) WT and Zeb1-deficient Flt3L-cDC1 were cultured with  $1 \times 10^8$  CFU Alexa Fluor 647-labelled, or FITC-labelled, or pHrodo-labelled HKLM-OVA for the indicated times. The mean intensity of indicated fluorescence was analyzed by flow cytometry to reflect the change of phagosomal pH. (g and h) DQ-OVA/Alexa Fluor 647-OVA were introduced into the cytosols of WT and Zeb1-deficient Flt3L-cDC1 by electroporation, and cytosolic antigen degradation were measured by flow cytometric analysis after chasing for indicated time (g). The cytosolic antigens degradation was quantified as the ratio of FITC (DQ-OVA)<sup>+</sup> cells to Alexa Fluor 647<sup>+</sup> cells (h, left) or the ratio of MFI of FITC (DQ-OVA) fluorescence to MFI of Alexa Fluor 647 fluorescence (h, right). (i) Confocal microscope images of steady WT and Zeb1-deficient Flt3L-cDC1 stained with anti-Lamp1, anti-Rab5, anti-Rab7 or anti-Rab11 antibodies. Data are representative of three independent experiments. Data are presented as mean  $\pm$  s.d. Statistical analysis was performed using two-tailed unpaired Student's t-test (h), or two-way ANOVA with Sidak's multiple comparisons test (f). Source data are provided as a Source Data file.



## Supplemental Figure 9 (continued)

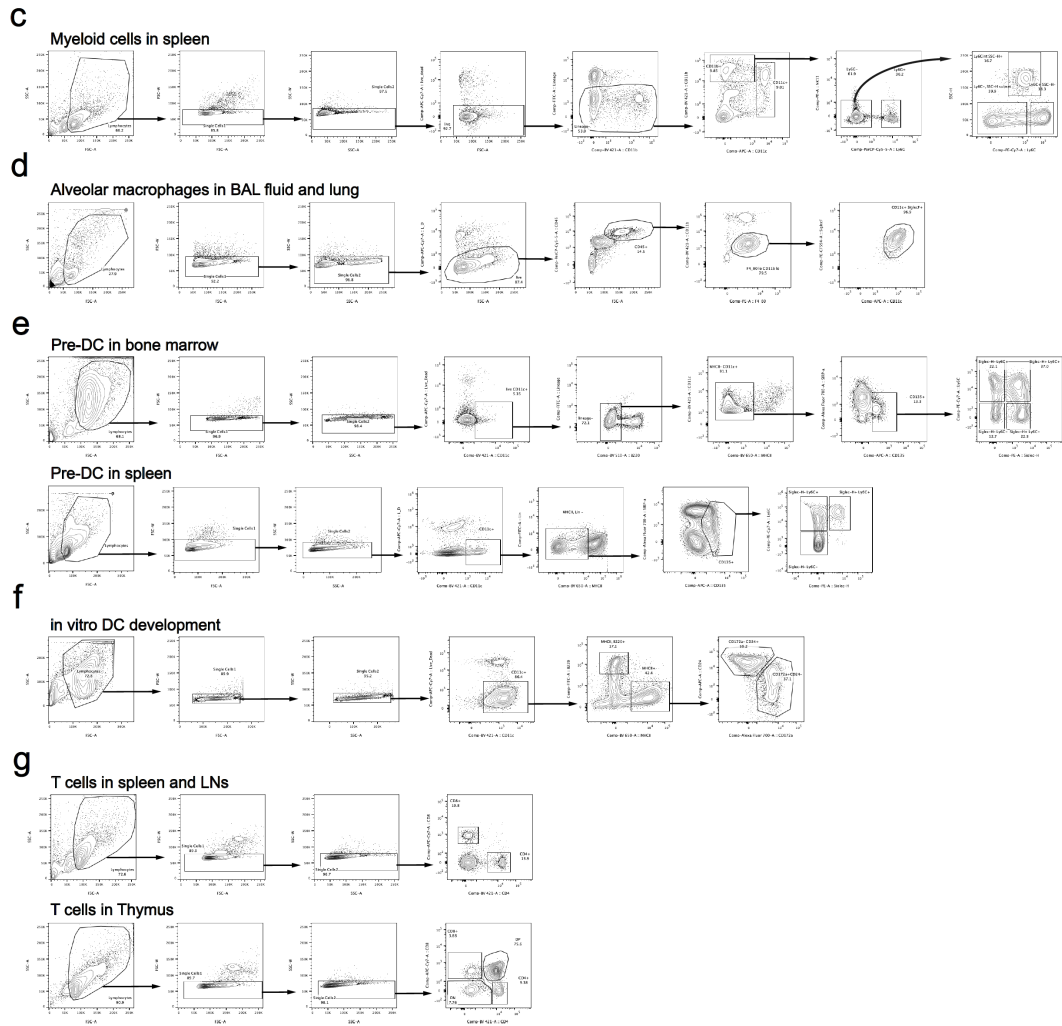



# Supplemental Figure 9 (continued)

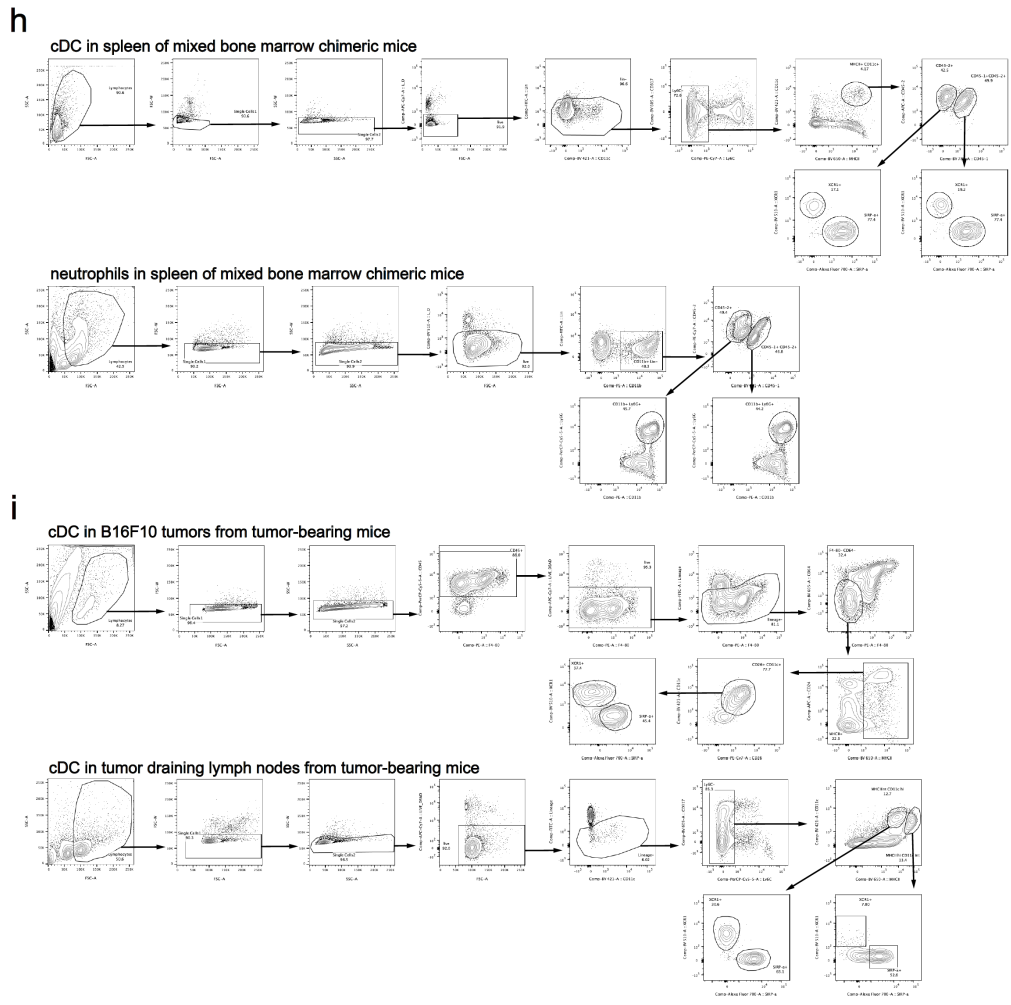



## Supplemental Figure 9 (continued)

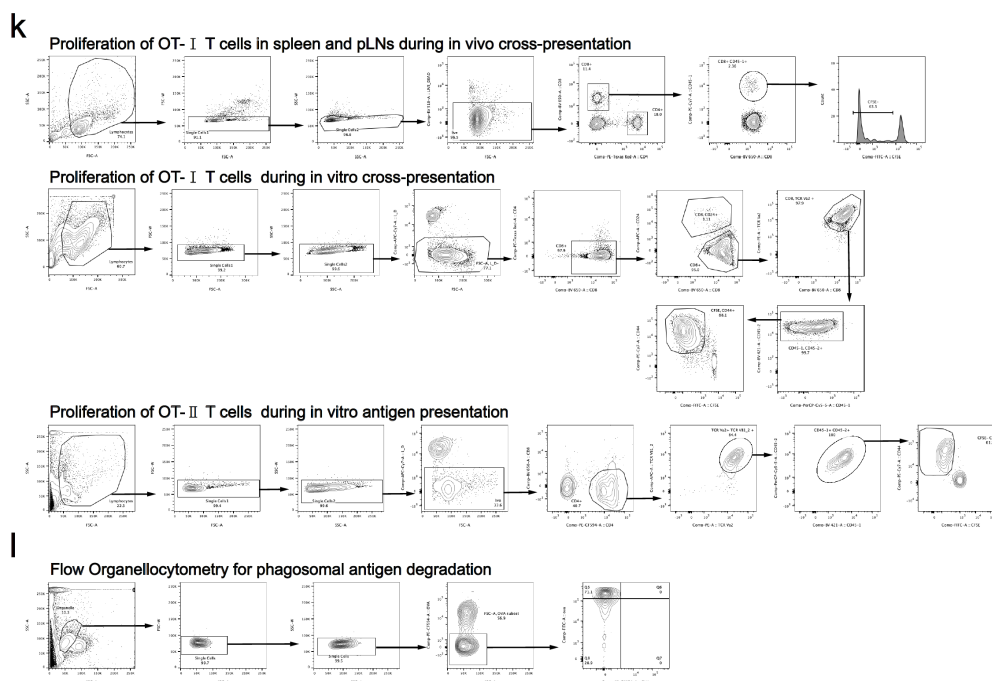

### Supplementary Fig. 9. Gating strategies of flow cytometric analysis.

(a) Representative flow cytometric plots showing gating strategy for cDC and pDC subsets in lymphoid tissues and non-lymphoid tissues. (b) Representative flow cytometric plots showing gating strategy for cell death, cleaved caspase-3 or Ki67 of cDC in lymphoid tissues. (c) Representative flow cytometric plots showing gating strategy for myeloid cells in spleen. (d) Representative flow cytometric plots showing gating strategy for alveolar macrophages in BAL fluid and lung. (e) Representative flow cytometric plots showing gating strategy used to identify pre-DC subsets in bone marrow and spleen. (f) Representative flow cytometric showing gating strategy for DC subsets in Flt3L-cultured BM cells. (g) Representative flow cytometric plots showing gating strategy for T cells in lymphoid tissues. (h) Representative flow cytometric plots showing gating strategy for cDC or neutrophils in spleen of mixed bone marrow chimeric mice. (i) Representative flow cytometric S plots showing gating strategy for cDC subsets in B16F10 tumors and tumor dLNs from tumor-bearing mice. (j) Representative flow cytometric plots showing the gating strategy for T cell activation, cytokine production, exhaustion and Treg population of tumor-infiltrating T cells, and for T cell activation in spleen and tumor dLNs, of tumor-bearing mice. (k) Representative flow cytometric plots showing gating strategy for proliferation of OT-I or OT-II T cells during in vivo cross-presentation or in vitro cross-presentation. (l) Representative flow cytometric plots showing gating strategy for phagosomal antigen degradation.

## **Supplementary Data**

**Supplementary Data 1.** Single-Cell Resolution Reveals Disruptions in Cell Population Composition and Differential Positive Gene Expression Ratios in splenic cDC Samples (WT vs. Zeb1-dcKO).

**Supplementary Data 2.** Insights into RNA-Seq data from steady Flt3L-cDC1 (WT vs. Zeb1-dcKO): Summary and Interpretation of Analysis Findings.

**Supplementary Data 3.** Insights into RNA-Seq Data from Flt3L-cDC1 (WT vs. Zeb1-dcKO) upon stimulation with HKLM-OVA for 4 hours: Summary and Interpretation of Analysis Findings.

**Supplementary Data 4.** Unveiling Insights from Comprehensive Analysis of Small RNA-Seq Data from Flt3L-cDC1 (WT vs. Zeb1-dcKO) upon stimulation with HKLM-OVA for 4 hours.

**Supplementary Data 5.** The information of all antibodies used in this study for cell purification, for flow cytometry, for immunofluorescence, for western blot and for ELISA.
